# Supplementary material for: Effect of Elevated Temperature on Tomato Post-Harvest Properties
Source: MDPI journal article supplement (doi:10.3390/plants10112359), 2021-11-01
Supplement: s1 [file s1]

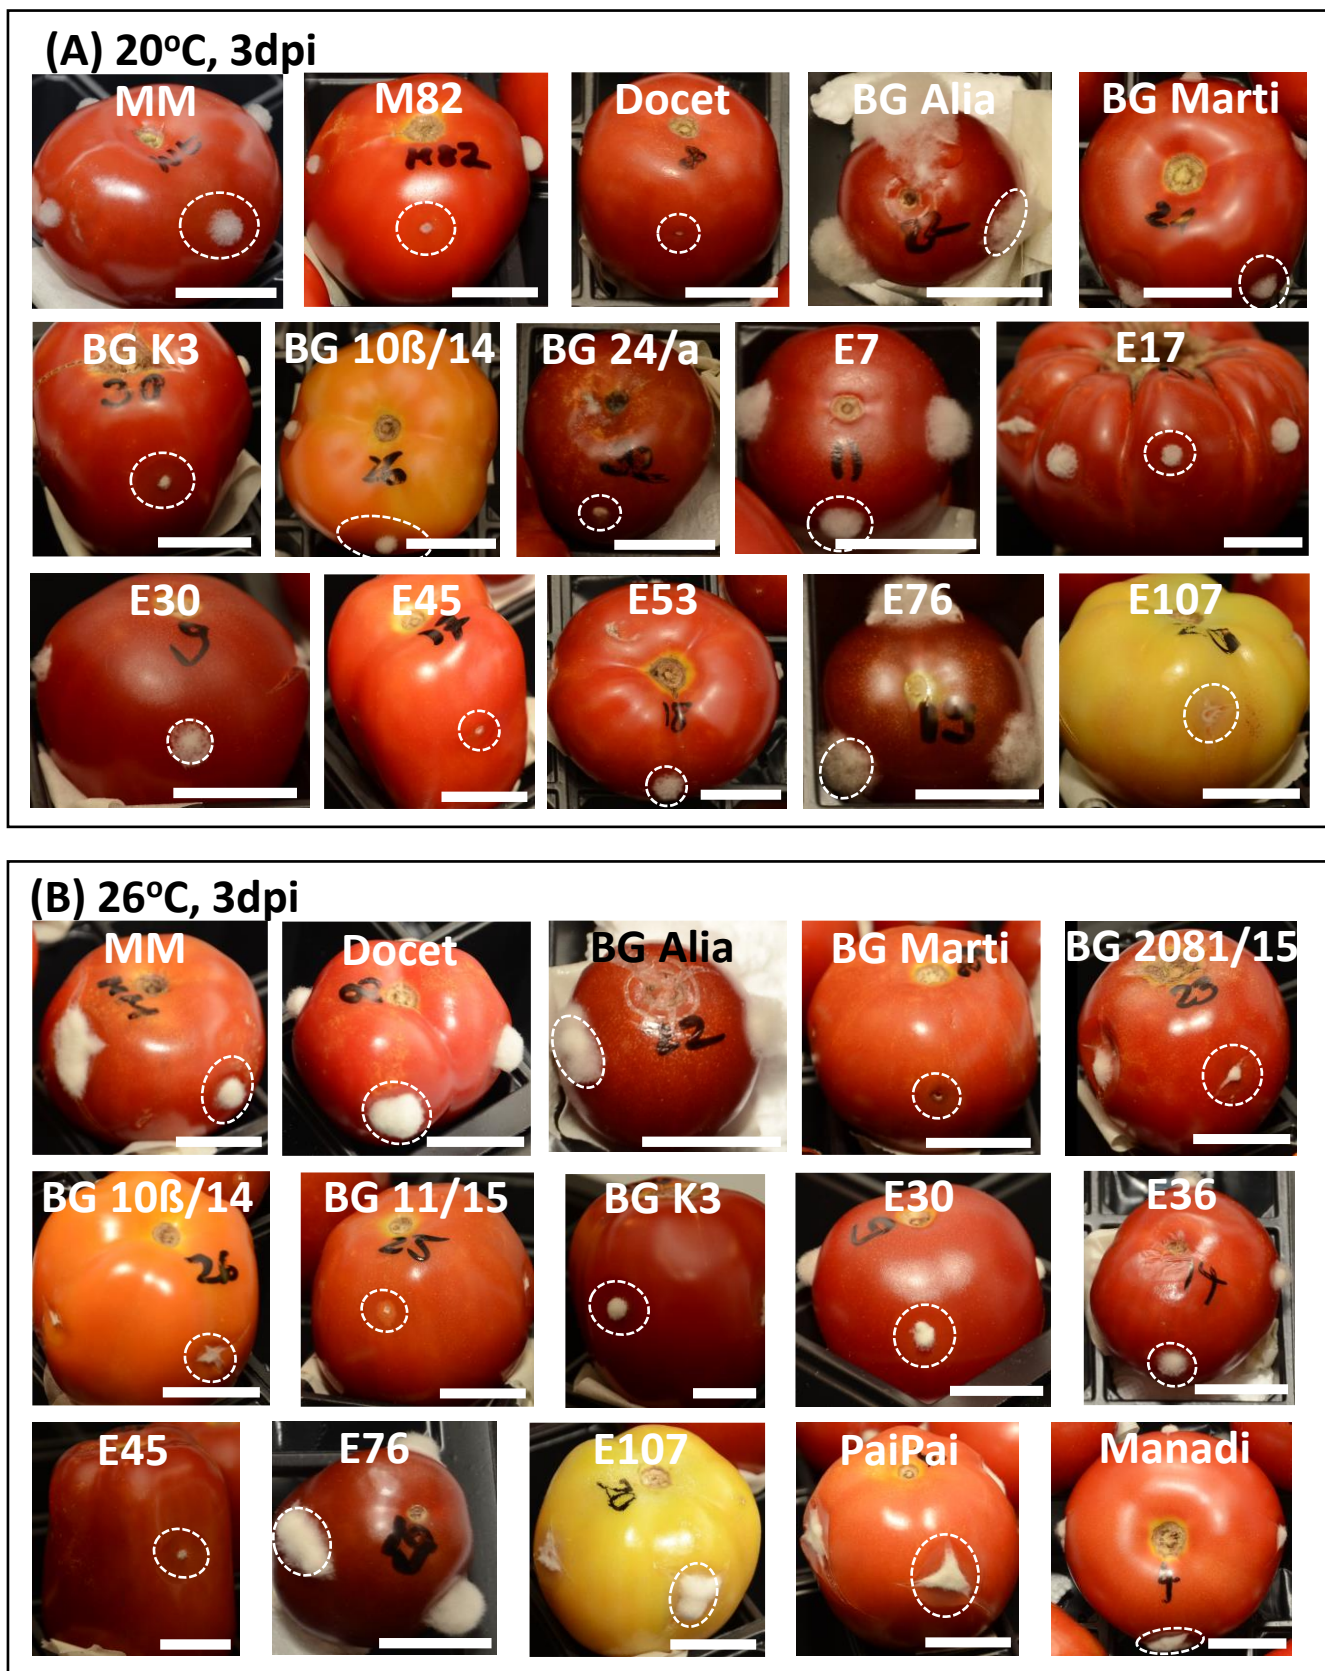

**Figure S3:** Fungal susceptibility of a selection of tomato genotypes at normal and elevated temperature. Fungal growth (lesion size and aspect) on fruits at 3 dpi following wound inoculation with *B. cinerea* (strain B05.10) and incubation at 20°C (A) and 26°C (B). On each fruit, the size of a lesion is highlighted with a dotted circle. The white bar in each image represents 2 cm.
